# Supplementary material for: The W195 Residue of the Newcastle Disease Virus V Protein Is Critical for Multiple Aspects of Viral Self-Regulation through Interactions between V and Nucleoproteins
Source: MDPI journal article supplement (doi:10.3390/v16040584), 2024-04-10
Supplement: s1 [file s1]

**Table S1.** Primers used in this study

| Primer name                   | Primer sequence 5'---3'                       |
|-------------------------------|-----------------------------------------------|
| eGFP-F                        | <b>CCATCGAT</b> ATGGTGAGCAAGGGCGAGGAG         |
| eGFP-R                        | ACAT <b>GCATGCT</b> TACTTGTACAGCTCGTCCATGCC   |
| Fluc-F                        | <b>CCATCGAT</b> ATGGAAGATGCCAAAAACATTAAG      |
| Fluc-R                        | AT <b>GCATGCA</b> CTTTACACGGCGATCTTGCCGCCCTTC |
| LaSota-NP-F                   | <b>CGGAATTC</b> ATGTCTTCCGTATTTGATGAGTACGA    |
| LaSota-NP-R                   | CCG <b>CTCGAGT</b> CAATACCCCCAGTCGGTGTCGTTA   |
| LaSota-P-F                    | <b>CGGAATTC</b> ATGGCCACCTTTACAGATGCAGAGA     |
| LaSota-P-R                    | CCG <b>CTCGAGT</b> TAGCCATTTAGAGCAAGGCGCTTG   |
| LaSota-L-F                    | CATG <b>CCATGGC</b> GAGCTCCGGTCCTGAAAG        |
| LaSota-L-R                    | GG <b>ACTAGT</b> TTAAGAGTCACAGTTACTGTAATATCC  |
| T7-F                          | <b>CGGAATTC</b> ATGAACACGATTAACATCGCTAAG      |
| T7-R                          | CCG <b>CTCGAGT</b> TACGCGAACGCGAAGTCCGACTC    |
| LaSota-V-F                    | <b>CGGGATCC</b> ATGGCCACCTTTACAGATGCAG        |
| LaSota-V-R                    | <b>CCCTCGAGT</b> TACTTACTCTCTGTGATATC         |
| LaSota-M-F                    | <b>CGGAATTC</b> ATGGACTCATCTAGGACAATTGGGC     |
| LaSota-M-R                    | G <b>CTCTAGAT</b> TATTTCTTAAAAGGATTGTATTTGGC  |
| LaSota-W-F1                   | <b>CGGGATCC</b> ATGGCCACCTTTACAGATGCAG        |
| LaSota-W-R1                   | <b>CCCTCGAGT</b> CACGTCTGTGCCCTGGTTTC         |
| LaSota-W-F2                   | AATGCTAAAAAGGGGGCCCATGGTCGAGCCCCCAA           |
| LaSota-W-R2                   | GGGCCCCCTTTTTAGCATTGGAC                       |
| LaSota-F-F                    | <b>GGATCC</b> ATGGGCTCCAGACCTTCTACCAAG        |
| LaSota-F-R                    | cc <b>CTCGAGT</b> CACATTTTGTAGTGGCTCTC        |
| LaSota-HN-F                   | <b>GGATCC</b> ATGGACCGCGCCGTTAGCCAAG          |
| LaSota-HN-R                   | G <b>CTCTAGAC</b> TAGCCAGACCTGGCTTCTCTAAC     |
| LaSota-NP-F                   | <b>GAATTC</b> ATGTCTTCCGTATTTGATGAGTACG       |
| LaSota-NP-R                   | <b>CTCGAGT</b> CAATACCCCCAGTCGGTGTCG          |
| LaSota-V <sub>W195R</sub> -F1 | <b>CGGGATCC</b> ATGGCCACCTTTACAGATGCAG        |
| LaSota-V <sub>W195R</sub> -F2 | CAACTATCAGCGCCTGCAACCCCTCATG                  |
| LaSota-V <sub>W195R</sub> -R1 | <b>CCCTCGAGT</b> TACTTACTCTCTGTGATATC         |
| LaSota-V <sub>W195R</sub> -R2 | CATGAGGGGTTGCAGGCGCTGATAGTTG                  |
| LaSota-V <sub>1-221</sub> -F  | <b>CGGGATCC</b> ATGGCCACCTTTACAGATGCAG        |
| LaSota-V <sub>1-221</sub> -R  | CCG <b>CTCGAGT</b> TAAACAGGTGGCTGGACATGATCCG  |
| LaSota-V <sub>1-198</sub> -F  | <b>CGGGATCC</b> ATGGCCACCTTTACAGATGCAG        |
| LaSota-V <sub>1-198</sub> -R  | CCG <b>CTCGAGT</b> TAGGGGTTGCACCAGCTGATAG     |
| LaSota-V <sub>1-197</sub> -F  | <b>CGGGATCC</b> ATGGCCACCTTTACAGATGCAG        |
| LaSota-V <sub>1-197</sub> -R  | CCG <b>CTCGAGT</b> TAGTTGCACCAGCTGATAGTTG     |
| LaSota-V <sub>1-196</sub> -F  | <b>CGGGATCC</b> ATGGCCACCTTTACAGATGCAG        |
| LaSota-V <sub>1-196</sub> -R  | CCG <b>CTCGAGT</b> TAGCACCAGCTGATAGTTGTG      |
| LaSota-V <sub>1-195</sub> -F  | <b>CGGGATCC</b> ATGGCCACCTTTACAGATGCAG        |
| LaSota-V <sub>1-195</sub> -R  | CCG <b>CTCGAGT</b> TACCAGCTGATAGTTGTGAC       |
| LaSota-V <sub>1-194</sub> -F  | <b>CGGGATCC</b> ATGGCCACCTTTACAGATGCAG        |
| LaSota-V <sub>1-194</sub> -R  | CCG <b>CTCGAGT</b> TAGCTGATAGTTGTGACTCC       |

|                                    |                                                                                                                                        |
|------------------------------------|----------------------------------------------------------------------------------------------------------------------------------------|
| LaSota-V <sub>1-193</sub> -F       | CGGGATCCATGGCCACCTTTACAGATGCAG                                                                                                         |
| LaSota-V <sub>1-193</sub> -R       | CCGCTCGAGTTAGATAGTTGTGACTCCTCCC                                                                                                        |
| LaSota-V <sub>1-192</sub> -F       | CGGGATCCATGGCCACCTTTACAGATGCAG                                                                                                         |
| LaSota-V <sub>1-192</sub> -R       | CCGCTCGAGTTAAGTTGTGACTCCTCCCATG                                                                                                        |
| LaSota-V <sub>1-191</sub> -F       | CGGGATCCATGGCCACCTTTACAGATGCAG                                                                                                         |
| LaSota-V <sub>1-191</sub> -R       | CCGCTCGAGTTATGTGACTCCTCCCATGTCC                                                                                                        |
| LaSota-V <sub>1-183</sub> -F       | CGGGATCCATGGCCACCTTTACAGATGCAG                                                                                                         |
| LaSota-V <sub>1-183</sub> -R       | CCGCTCGAGTTATATGCTGTGTTACGTCTGTG                                                                                                       |
| LaSota-V <sub>1-175</sub> -F       | CGGGATCCATGGCCACCTTTACAGATGCAG                                                                                                         |
| LaSota-V <sub>1-175</sub> -R       | GCCCTCGAGTTATGGTTTCCAGGGGCGGCCTTG                                                                                                      |
| rF48-P <sub>W195R</sub> -F1        | AGCTTTGTTTAAACAGAACCAAAGACATTAGAAAAAA<br>ATACG                                                                                         |
| rF48-P <sub>W195R</sub> -R1        | TGCCTTAATTAAGGTTGCGCGATTATTTAATGAGATAG<br>AGGAGG                                                                                       |
| rF48-P <sub>W195R</sub> -F2        | ACAACATATCAGCCGGTGCAATCCCTCATG                                                                                                         |
| rF48-P <sub>W195R</sub> -R2        | CATGAGGGGATTGCACCGGCTGATAGTTGT                                                                                                         |
| chicken 28S qPCR-F                 | GGTATGGGCCCCGACGCT                                                                                                                     |
| chicken 28S qPCR-R                 | CCGATGCCGACGCTCAT                                                                                                                      |
| chicken IFN- $\beta$ qPCR-F        | GCTCACCTCAGCATCAACAA                                                                                                                   |
| chicken IFN- $\beta$ qPCR-R        | GGGTGTTGAGACGTTTGGAT                                                                                                                   |
| Fluc (vRNA)- reverse transcription | ACG ATA AAA GGC GAA GGA GCA                                                                                                            |
| Fluc (cRNA)- reverse transcription | ATG ACG AGA CTA CAC TCA AG                                                                                                             |
| Fluc-qPCR-F                        | 5'-CGCACATATCGAGGTGGACA-3'                                                                                                             |
| Fluc-qPCR-R                        | 5'-GCAAGCTATTCTCGCTGCAC-3'                                                                                                             |
| oligonucleotide linker             | ACTTGGCGCGCCAAGCTTTGTTTAAACGGCCCTTAATT<br>AAGGACGCGATCGCGTATAAGAATGCGGCCGCTAAAC<br>TATGCTACGTACCGGACTAGTCCTCCCCGCGGGGATTC<br>GGTCCGAAT |
| F48E9-Asc-T7-F                     | AGTTGGCGCGCCTAATACGACTCACTATAGGGACCAA<br>ACAGAGATTCTGTGAGGTACGATAAAAAGC                                                                |
| F48E9-Pme1780-F                    | AGCTTTGTTTAAACAGAACCAAAGACATTAGAAAAAA<br>ATACG                                                                                         |
| F48E9-Pme1780-R                    | CCGGCGCGCCGTTTAAACTGTTGATGGGTCAAGTTGTG<br>CCTGTGTTG                                                                                    |
| F48E9-Pac3229-F                    | TGCCTTAATTAATCCTGCAACATTAATGATTAAGAAAA<br>AATACGG                                                                                      |
| F48E9-Pac3229-R                    | TGCCTTAATTAAGGTTGCGCGATTATTTAATGAGATAG<br>AGGAGG                                                                                       |
| F48E9-AsiS4462-F                   | ACGATTGCGATCGCTTATAGTTAGCTCACCTGTCTATC                                                                                                 |
| F48E9-AsiS4462-R                   | ACGATTGCGATCGCGACAGATCATTATTTGGCGCCGT<br>GGTG                                                                                          |
| F48E9-Not6262-F                    | ATAAGAATGCGGCCGCCTGTCAATTAGAAGAATTAAG                                                                                                  |

---

|                     |                                                 |
|---------------------|-------------------------------------------------|
|                     | AAAAAACTACC                                     |
| F48E9-Not6262-R     | ATAGTTT <b>AGCGGCCG</b> CAATTCACACACAAATTGCTCTT |
|                     | GGAGATAC                                        |
| F48E9-delRsr6493-F  | TTCGAACAGCAGTCTTACTTTTAATAGTAGTGACCTTT          |
|                     | TC                                              |
| F48E9-delRsr6493-R  | GTCACTACTATTAAAAGTAAGACTGCTGTTCGAAATA           |
|                     | CCAAGCGCCATGTATTTTTCG                           |
| F48E9-SnaB8333-F    | ATCAGG <b>TACGT</b> AGTAGTGAGATACGAGACAAAGCAAC  |
|                     | TCAC                                            |
| F48E9-SnaB8333-R    | ATCAGG <b>TACGT</b> ATATTTTTTCTTAATCAAGTGACTATT |
|                     | GGCAAG                                          |
| F48E9-Spe11267-F    | <b>GGACTAGT</b> CCACCTGGTAATGGAGATTGGGCCAG      |
| F48E9-Spe11267-R    | <b>GGACTAGT</b> TAAAGATGTTAGTCATAATGCTAGGAC     |
| F48E9-Sac13218-F    | TCCCC <b>GCGG</b> AAGAAAAATGTTCACTACTGAG        |
| F48E9-Sac13218-R    | TCCCC <b>GCGG</b> ATAAGCCTCTTATTTTCGGGATTTTC    |
| F48E9-delRsr13828-F | GGGCCAACCCCGACACAGTTCCTGAATTCAGTC               |
| F48E9-delRsr13828-R | GACTGAATTCAGGAACTGTGTCTGGGGTTGGCCCGAAA          |
|                     | TGTCGCTGTGGGGGGTTCATC                           |
| F48E9-Rsr-Rbz-R     | GGT <b>CCGG</b> ACCGCGAGGAGGTGGAGATGCCATGCCGAC  |
|                     | CCACCAAACAAAGATTTGGTGAATGACAGAAC                |
| Pac-GFP-F           | <b>CCTTAATTA</b> ATTAGAAAAACACGGGTAGAACGCCAC    |
|                     | CATGGTGAGCAAGGGCGAGGAGCTGTTC                    |
| CE-PacI-GFP-R       | TCATTAATGTTGCAGG <b>TTAATTA</b> ATTACTTGTACAGC  |
|                     | TCGTC                                           |

---

The restriction enzyme sites are in italic font and bold.
